# Supplementary material
Source: PubMed Central journal article supplement (PMC7617198)

**A**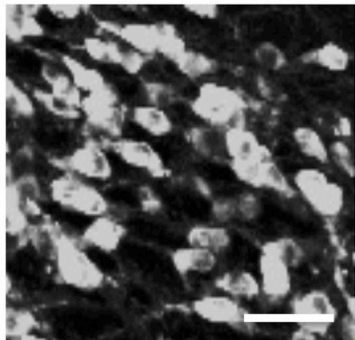**LSL-DTR**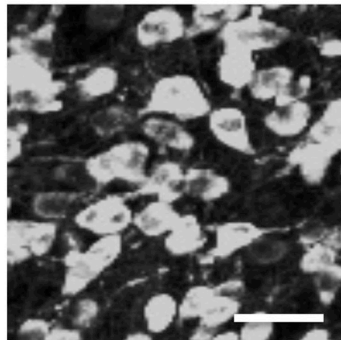**TH-Cre; LSL-DTR****B**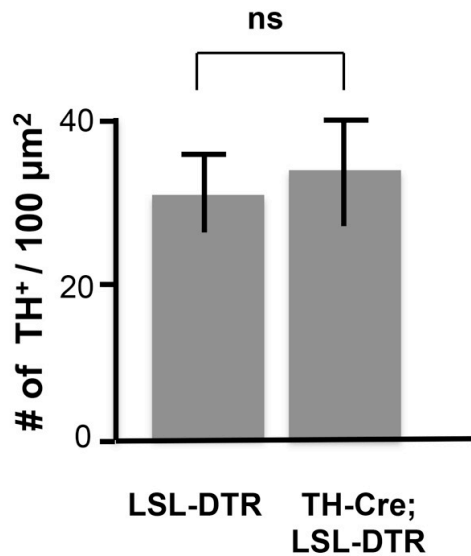

Supplement: EMS83502-supplement-Fig__S1.pdf [file EMS83502-supplement-Fig__S1.pdf]

**A**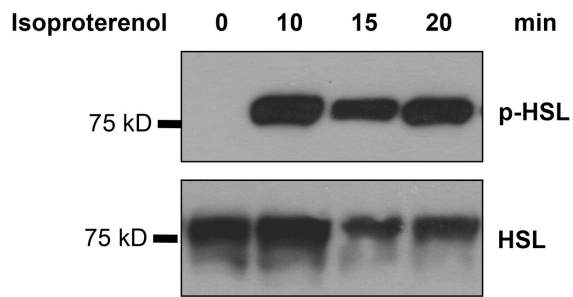**B**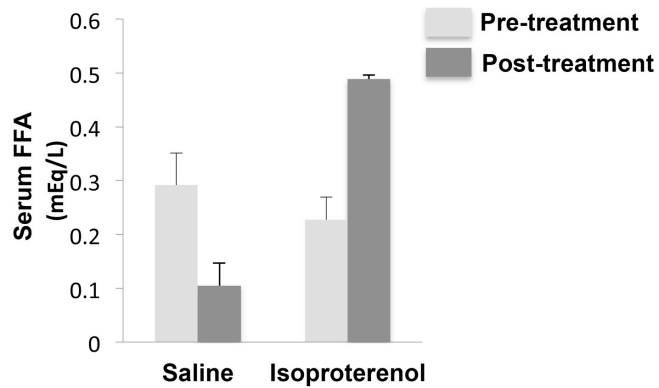**C**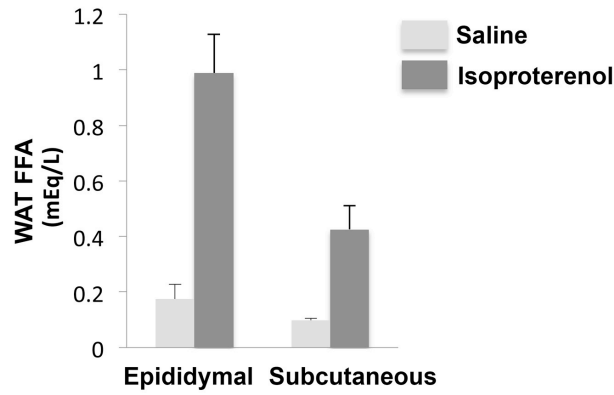

Supplement: EMS83502-supplement-Fig__S2.pdf [file EMS83502-supplement-Fig__S2.pdf]
